# Supplementary material
Source: PubMed Central journal article supplement (PMC3589170)
Supplement: mt2012252x1.pdf [file mt2012252x1.pdf]

**Fig.S1**

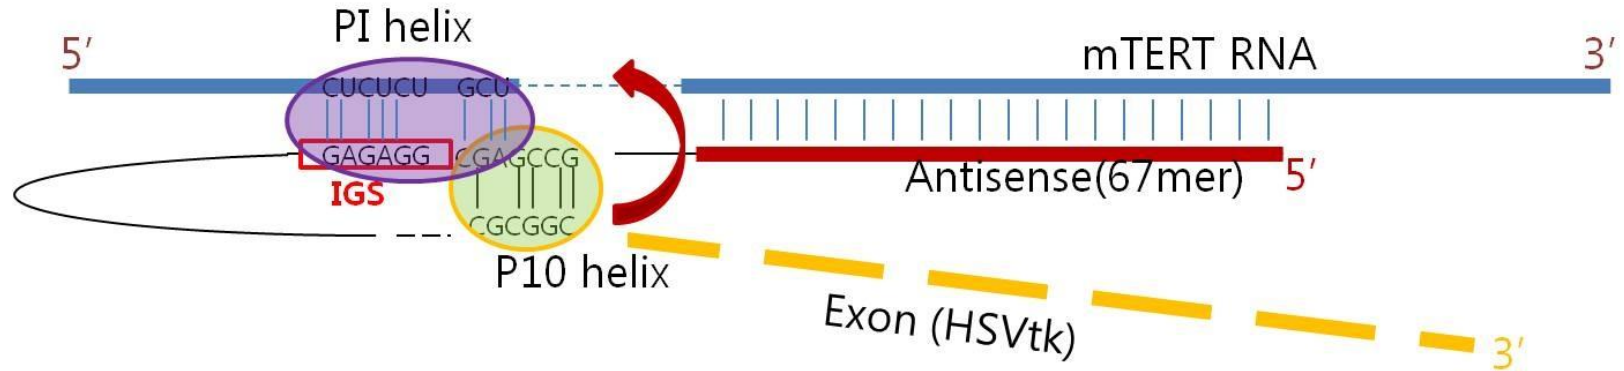

**Fig.S1. Schematic diagram of the mouse TERT-targeting *trans*-splicing ribozyme (mTERT-TR)-HSVtk construct.** The target site on the mouse TERT(mTERT) transcript is represented by sequences around the splicing site (blue and red lines). The *trans*-splicing ribozyme recognizes mTERT RNA specifically using anti-sense mTERT RNA sequence (red line; 67 mer) and digests mTERT RNA at 3' end of the internal-guided-sequence (IGS). Then 5' end of HSVtk coding RNA part of the *trans*-splicing ribozyme (yellow line) is ligated to the digested end of mTERT RNA (indicated as red arrow). Potential base pairings between the mTERT target mRNA and ribozyme are indicated by vertical lines.

# Fig.S2

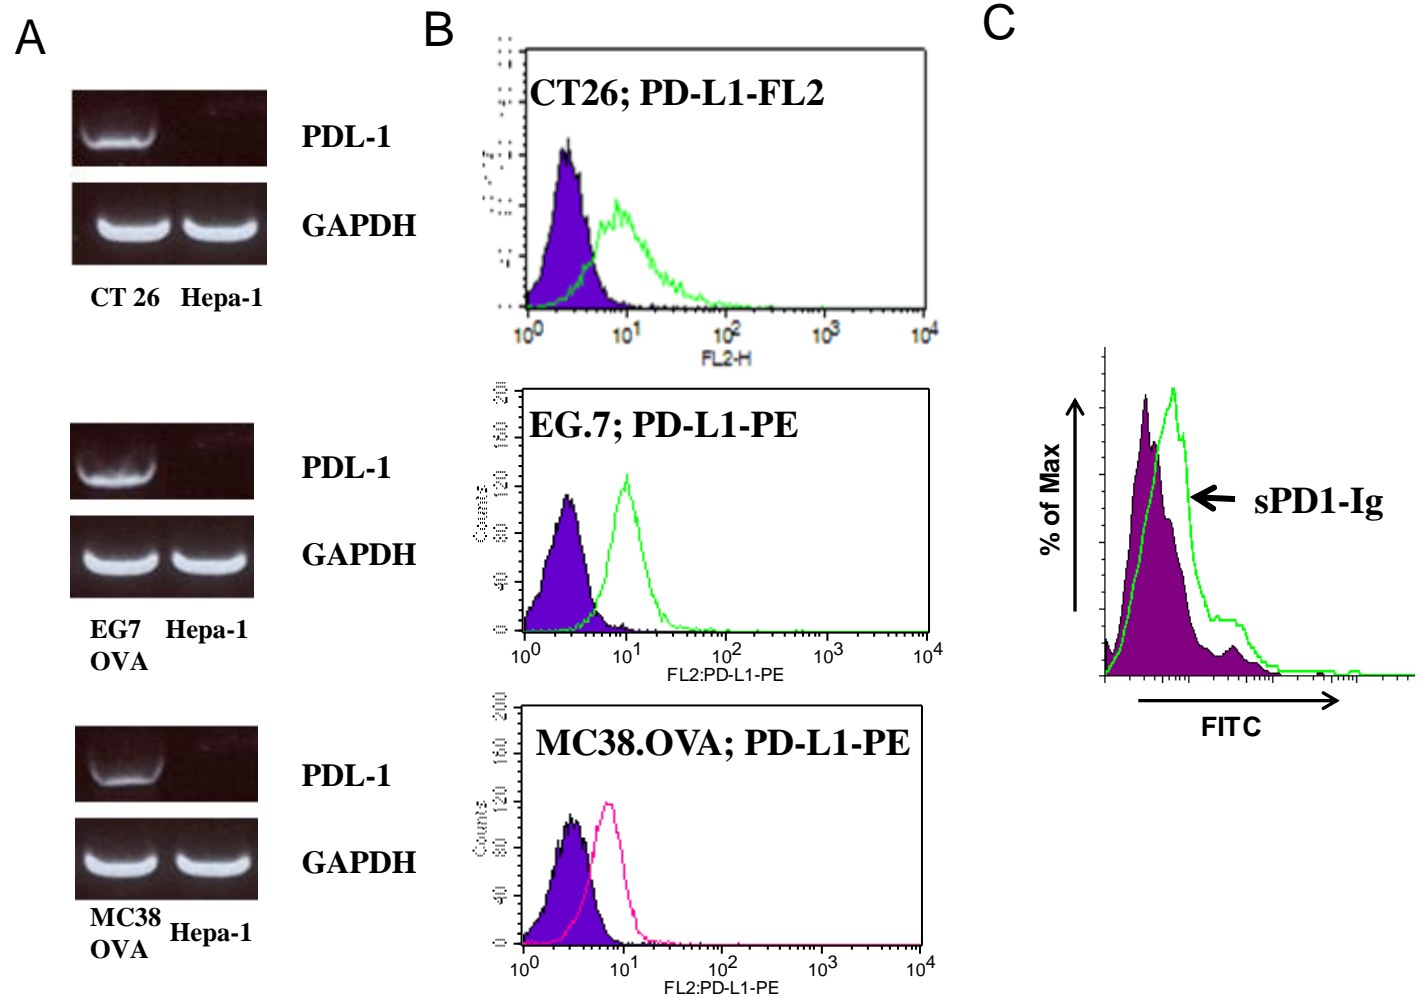

**Fig.S2. PD-L1 expression on the surface of mouse cancer cells.** **a.** Total RNA was prepared from each cell and PD-L1 transcripts were detected by RT-PCR. Mouse liver cancer cells (Hepa-1) were analyzed in parallel for comparison. **b.** PD-L1 proteins on the surface of each cell was analyzed by flow cytometry. **c.** The culture supernatant from Ad5mTR.sPD1-infected 293 cells was incubated with E.G7 cells and then sPD1-Ig proteins on the cell membrane were detected with anti-mouse FITC-conjugated antibody. The cells either treated with the secondary antibody alone (filled area) or with the culture supernatant along with the secondary antibody (open area) were analyzed by flow cytometry.
